# Supplementary material for: Kirigami electrodes of conducting polymer nanofibers for wearable humidity dosimeters and stretchable supercapacitors
Source: Royal Society of Chemistry journal article supplement (doi:10.1039/d0ta11335b), 2021-01-01
Supplement: d0ta11335b3.pdf [file d0ta11335b3.pdf]

## Supporting Information

### Kirigami Electrodes of Conducting Polymer Nanofibers for Wearable Humidity Dosimeters and Stretchable Supercapacitors

*Yifan Diao,<sup>†</sup> Reagan Woon,<sup>‡</sup> Haoru Yang,<sup>‡</sup> Alina Chow,<sup>‡</sup> Hongmin Wang,<sup>‡</sup> Yang Lu<sup>†</sup> and Julio M. D'Arcy<sup>\*,†,‡</sup>*

<sup>†</sup>Institute of Materials Science & Engineering, Washington University, St. Louis MO 63130, United States

<sup>‡</sup>Department of Chemistry, Washington University, St. Louis MO 63130, United States

\*Corresponding author: [jdarcy@wustl.edu](mailto:jdarcy@wustl.edu)

Keywords: Kirigami, Conducting polymers, Stretchable supercapacitor, Nanofibers, Wearable sensors.

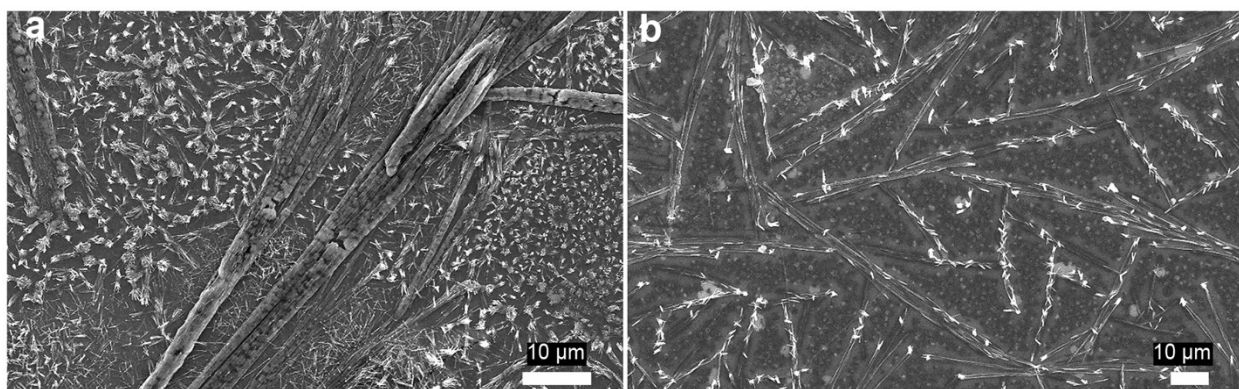

**Fig S1.** SEM images of ferrous chloride crystals and granular morphology of PEDOT.

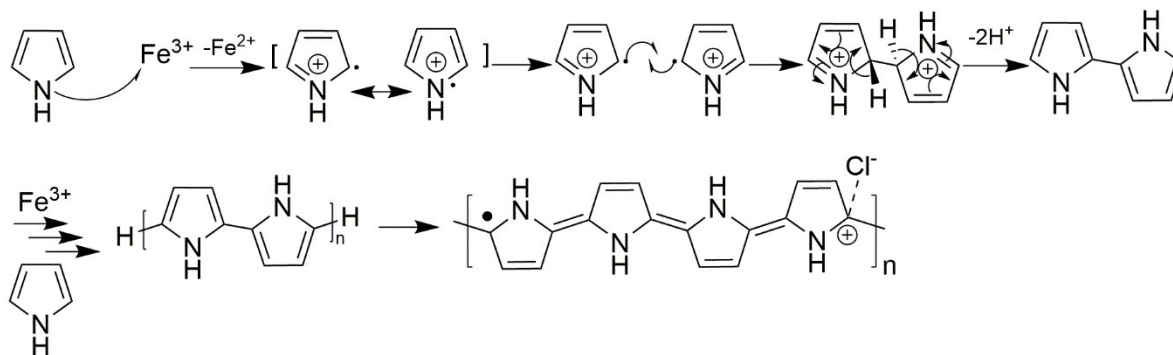

**Fig S2.** Step growth mechanism for PPy via oxidative radical polymerization.

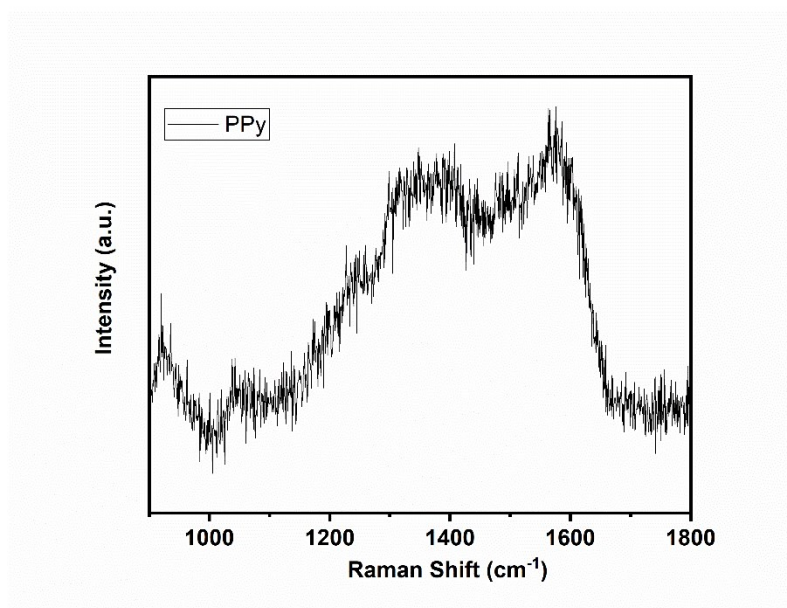

**Fig S3.** Raman spectra of the oxidized conjugated backbone of PPy.

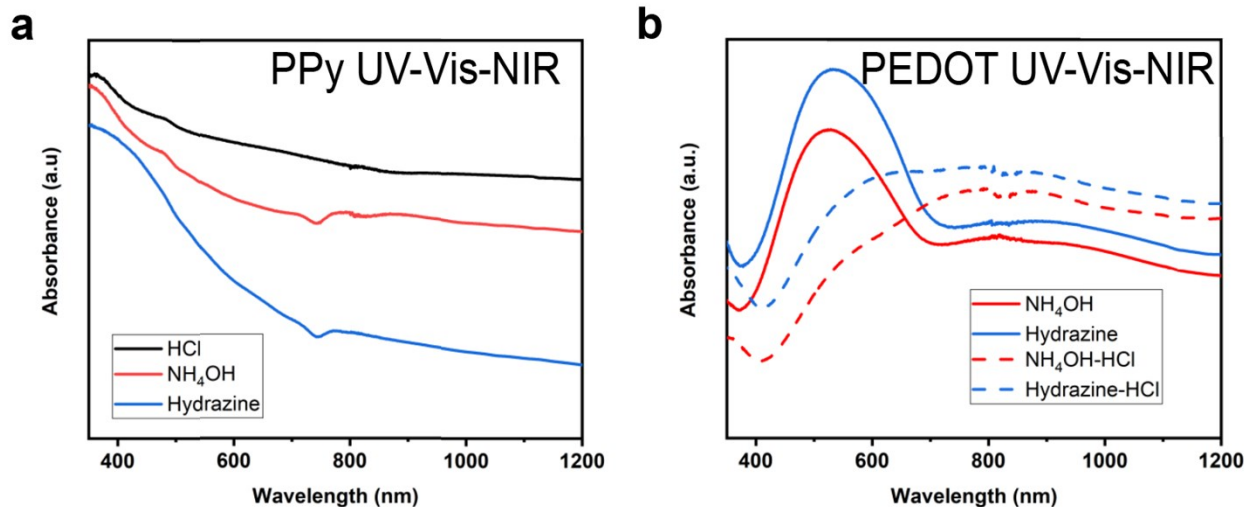

**Fig S4.** (a) UV-Vis-NIR spectra of PPy doped by HCl and dedoped by  $\text{NH}_4\text{OH}$  and hydrazine. (b) UV-Vis-NIR spectra of PEDOT dedoped by  $\text{NH}_4\text{OH}$  and hydrazine and subsequently re-doped by HCl.

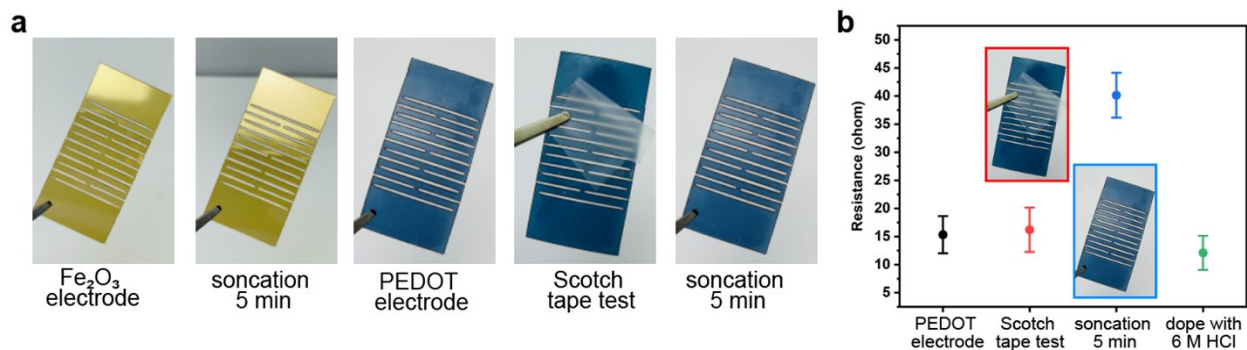

**Fig S5.** (a) Adhesion strength of PEDOT electrode demonstrated after sonication, scotch tape tests and via (b) resistance characterization.

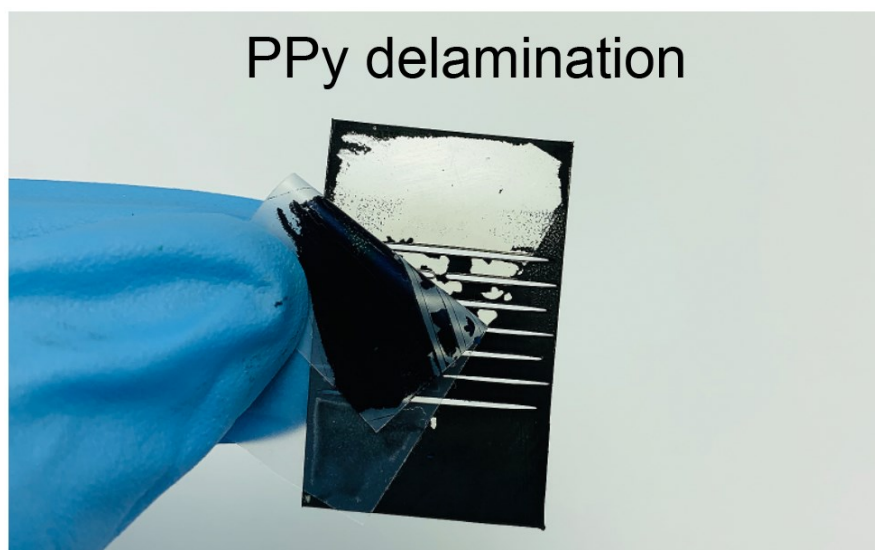

**Fig S6.** PPy film delaminate from Kirigami sheet.

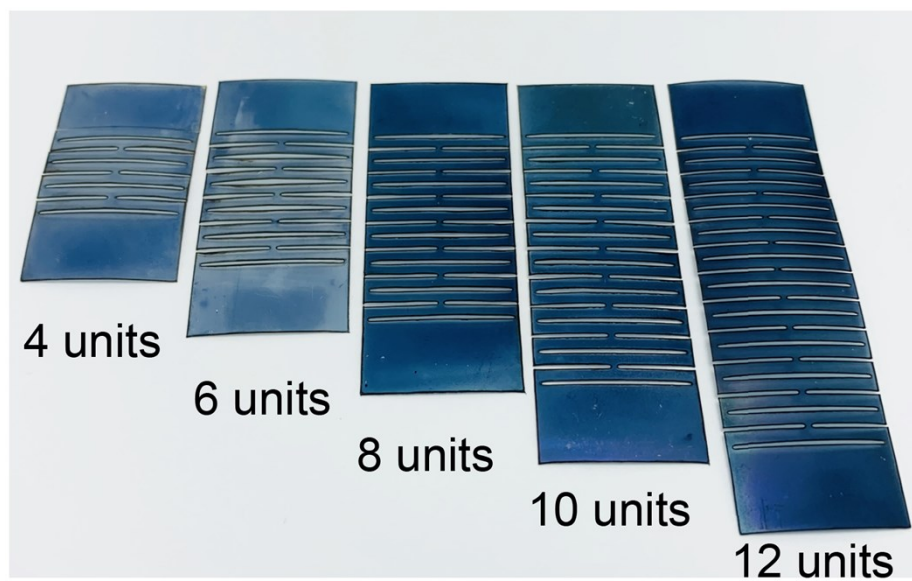

**Fig S7.** Nanofibrillar PEDOT Kirigami sheets with increasing number of unit cells.

## four-point probe

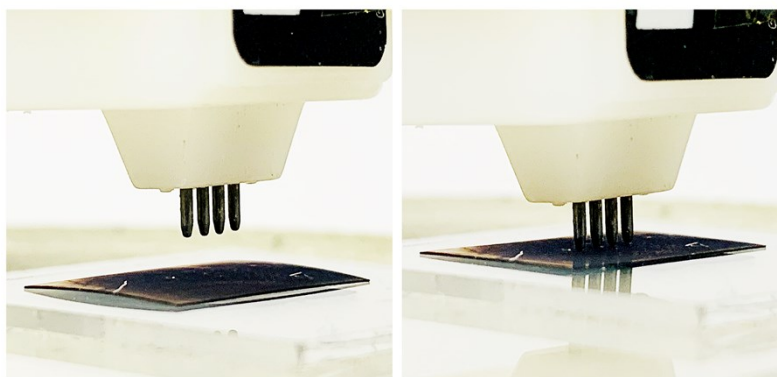

**Fig S8.** Conductivity measurement via four-point probe.

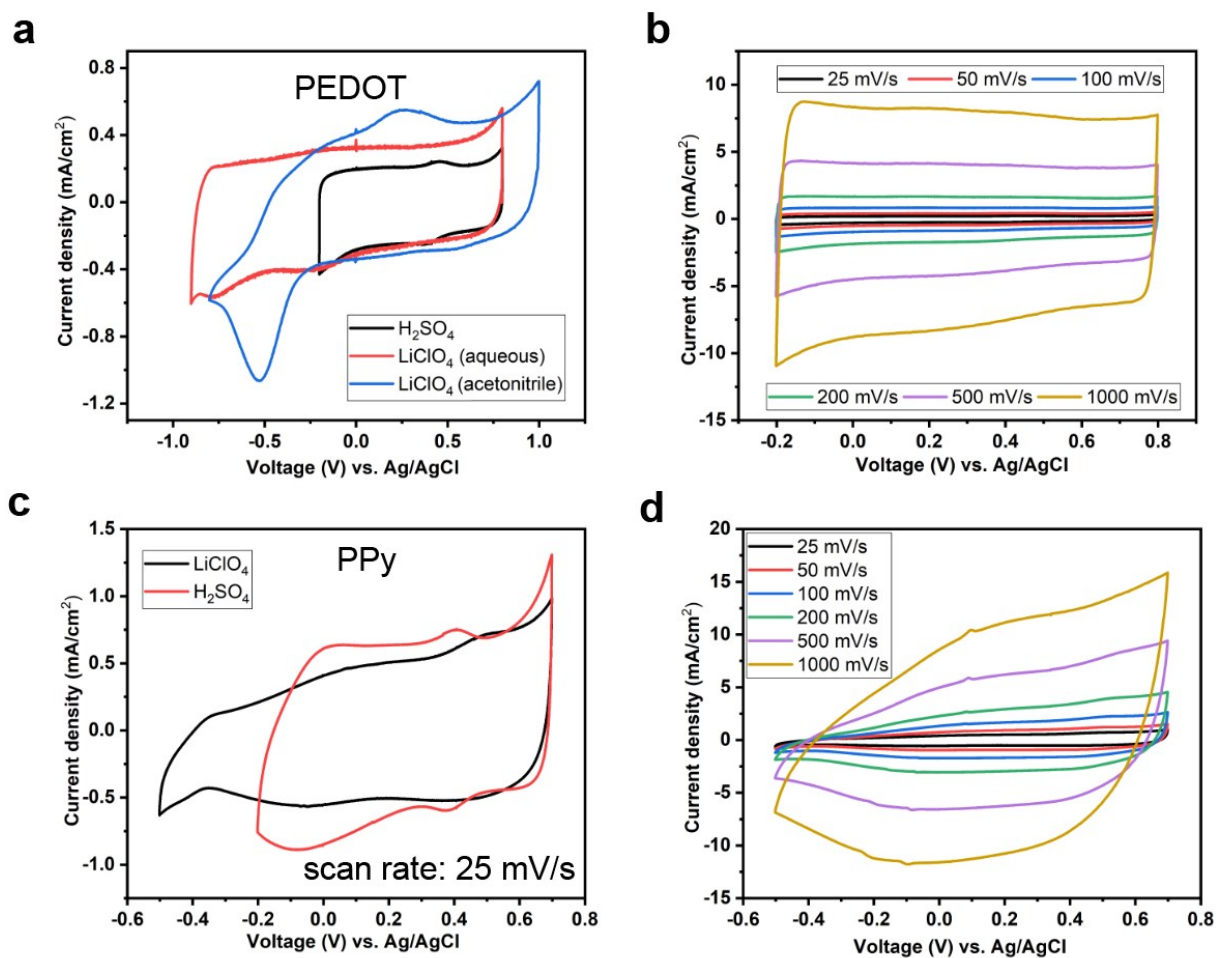

**Fig S9.** (a) CV scans of PEDOT in 1M  $\text{H}_2\text{SO}_4$ , 1M aqueous  $\text{LiClO}_4$  and 1M  $\text{LiClO}_4$  in acetonitrile. (b) Rectangular CV response of PEDOT in 1M  $\text{H}_2\text{SO}_4$  electrolyte under scan rates ranging from

25 to 1000 mV/s. (c) CV scans of PPy in LiClO<sub>4</sub> and H<sub>2</sub>SO<sub>4</sub> aqueous electrolyte. (d) CV response of PPy in 1M LiClO<sub>4</sub> aqueous electrolyte under scan rates ranging from 25 to 1000 mV/s.

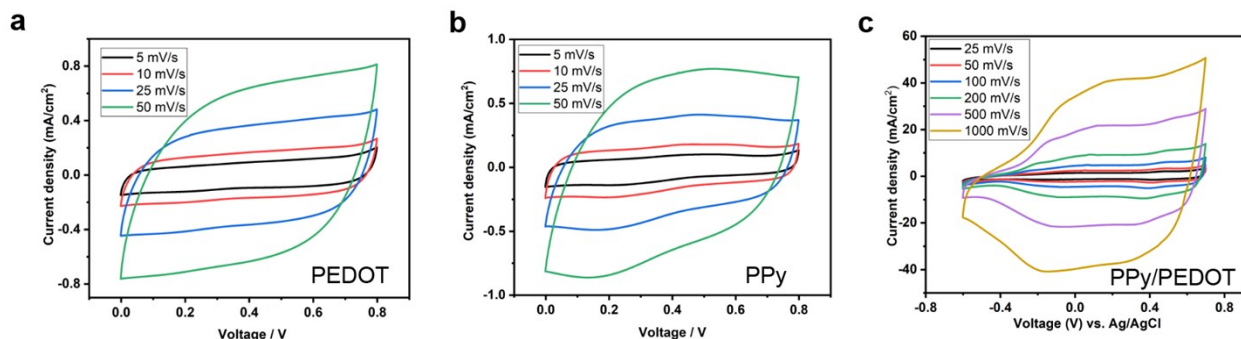

**Fig S10.** CV scans of (a) PEDOT, (b) PPy and (c) PPy/PEDOT in 1M LiClO<sub>4</sub> electrolyte under various scan rates.

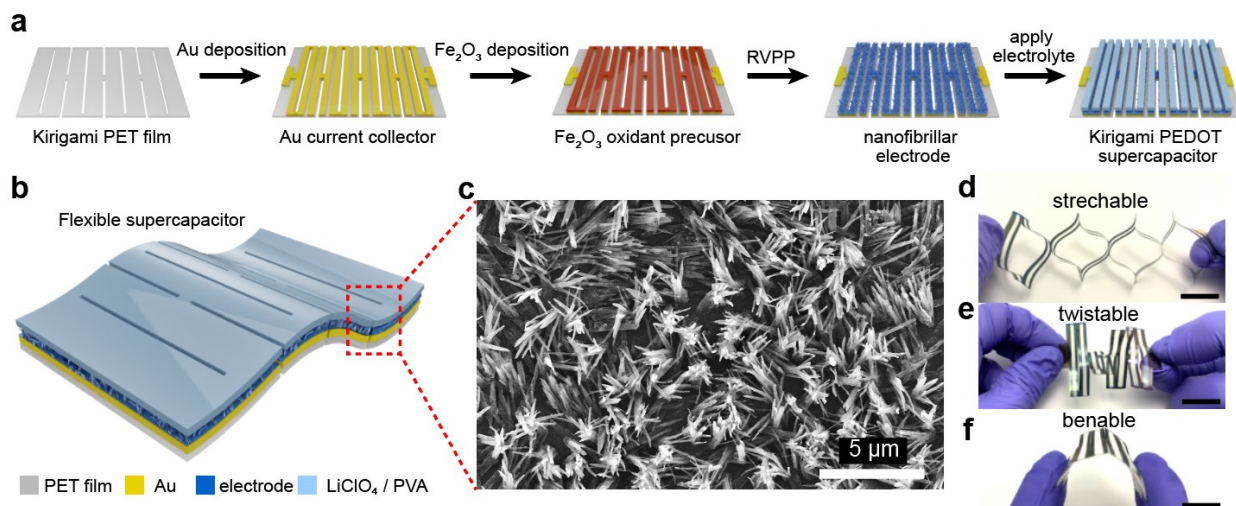

**Fig S11.** (a) Fabrication process of a nanofibrillar PEDOT Kirigami-based supercapacitor in a planar configuration. (b) Schematic diagram of flexible supercapacitor (c) possessing a high packing density of 1D nanostructures. The supercapacitor withstands complex deformation including (d) stretching, (e) twisting and (f) bending.
